# Supplementary material for: Coexisting Psoriasis is Associated with An Increased Risk of Hospitalization for Patients with Inflammatory Bowel Disease: An Analysis of the National Inpatient Sample Database
Source: HighWire-hosted journal article supplement (doi:10.1136/jim-2020-001689), 2020-12-23
Supplement: jim-2020-001689supp001_data_supplement.pdf [file jim-2020-001689supp001_data_supplement.pdf]

Supplementary Table: Used ICD-10 codes

|                                       | ICD-10 codes                                                         |
|---------------------------------------|----------------------------------------------------------------------|
| <b>Diagnosis codes</b>                |                                                                      |
| IBD                                   | K510, K512, K513, K518, K519, K50                                    |
| Ps                                    | L40                                                                  |
| <b>Comorbidities</b>                  |                                                                      |
| Dyslipidemia                          | E78                                                                  |
| Old MI                                | I252                                                                 |
| Old PCI                               | Z9861                                                                |
| Old CABG                              | Z951                                                                 |
| Old pacemaker                         | Z950                                                                 |
| Atrial fibrillation/flutter           | I48                                                                  |
| Chronic obstructive pulmonary disease | J41, J42, J43, J44                                                   |
| Carotid artery disease                | I652                                                                 |
| Old stroke                            | I63                                                                  |
| Hypertension                          | I10                                                                  |
| Peripheral vascular disease           | I739                                                                 |
| Hypothyroidism                        | E03                                                                  |
| Diabetes Mellitus Type 1&2            | E10, E11                                                             |
| Obesity                               | E660, E6601, E6609, E661, E662, E668, E669                           |
| Congestive heart Failure              | I50                                                                  |
| Chronic Kidney Disease                | N18                                                                  |
| Liver disease                         | K70, K71, K72, K73, K74, K75, K76, K77                               |
| Electrolyte derangement               | E870, E871, E872, E873, E874, E875, E876                             |
| Maintenance dialysis                  | Z992                                                                 |
| Oxygen dependence                     | Z9981                                                                |
| Smoking                               | Z87891, F17200                                                       |
| Anemia                                | D50, D51, D52, D53, D55, D56, D57, D58, D59, D60, D61, D62, D63, D64 |
| CAD                                   | I2510                                                                |
| On anticoagulation                    | Z7901                                                                |
| <b>Hospital outcomes</b>              |                                                                      |
| Sepsis                                | A40, A41, R652                                                       |
| AKI                                   | N17                                                                  |
| DVT/PE                                | I82, I26                                                             |
| Blood Transfusion                     | 302                                                                  |
| GI bleed                              | K920, K921, K922                                                     |

## Abbreviations:

IBD: Inflammatory bowel disease, Ps: Psoriasis, MI: Myocardial infarction, PCI: percutaneous coronary intervention, CABG: Coronary artery bypass graft, COPD: Chronic obstructive pulmonary disease, DM: Diabetes Mellitus, CHF: Chronic congestive heart failure, CKD: Chronic kidney disease, O2: oxygen, median household income: median household income for patient's Zip code, CAD: Coronary artery disease, DVT: Deep venous thrombosis, PE: Pulmonary embolus, AKI: Acute kidney injury, GI: Gastro-intestinal
